# Supplementary material
Source: publisher figshare collection journal article supplement (https://tandf.figshare.com/ndownloader/files/13051589)
Supplement: Supplementary file 1 [file 13051589]

**Supporting Information**

Solvent-dependent structures of lanthanide–TCNQ coordination networks and their magnetic properties

CHIHIRO KACHI-TERAJIMA*, NORIHISA KIMURA, YUKA TOMORI, DAISUKE AKAHOSHI and TOSHIAKI SAITO


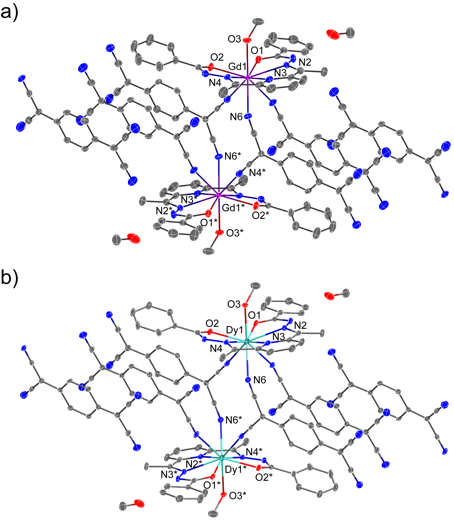


Figure S1. ORTEP drawings of (a) **1** and (b) **3** (Type-I). Hydrogens are omitted for clarity (50% probability thermal ellipsoids; symmetry codes (*) –*x*+2, –*y*+1, –*z*+1).


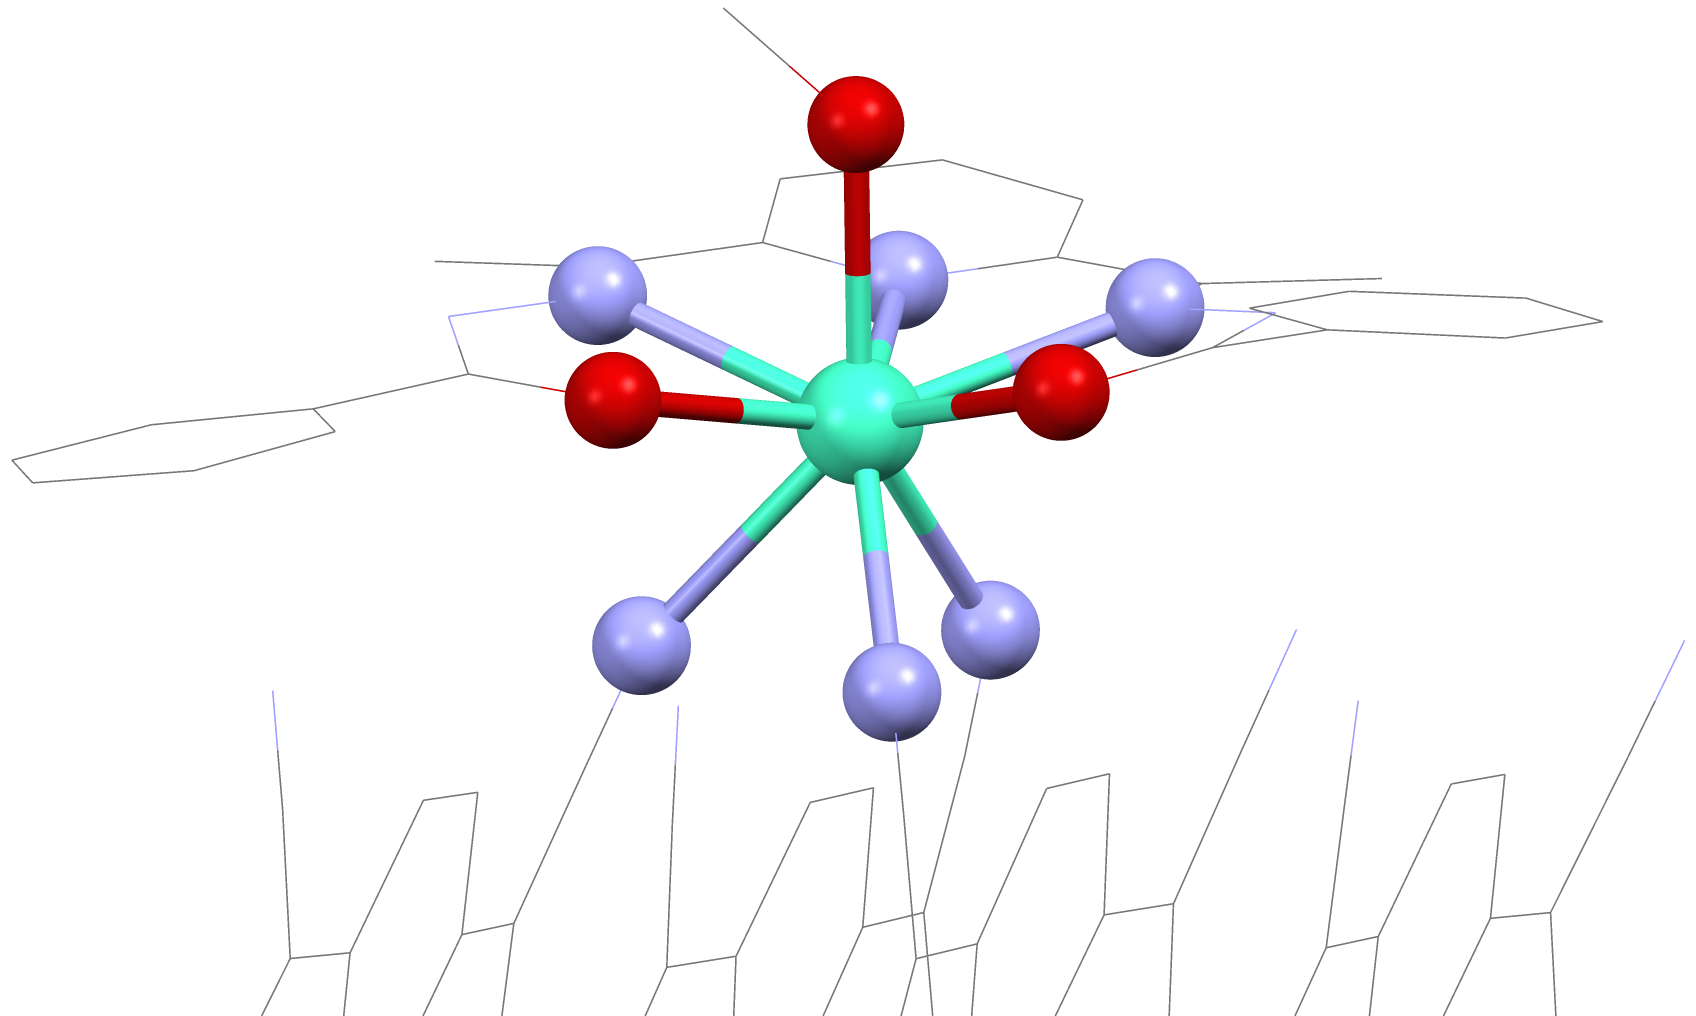


Figure S2. The core structure around GdIII ion for **1**. Gd, light-green; N, purple; O, red.


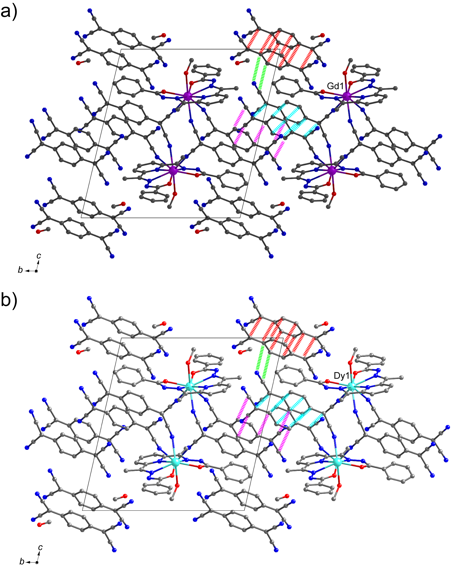


Figure S3. Crystal packing diagram of (a) **1** and (b) **3** (Type-I) projected along the *a*-axis. Gd, Dy, O, N, and C atoms are colored in purple, light-blue, red, blue, and gray, respectively. Red, light-green, light-blue, and magenta dotted lines show the  stacking between TCNQ molecules. (a) The shortest contacts between TCNQ•− molecules are C33···C45 = 3.133(4) Å, C44···C46i = 3.18(1) Å, C49···C58ii = 3.22(1) Å, and N9···C55iii = 3.20(1) Å for **1** (symmetry codes: i; −*x*+2, −*y*, −*z*+1, ii; −*x*+1, −*y*+2, −*z*, andiii; *x*, *y*−1, *z*). The close intermolecular contacts are C6···C12i = 3.21(1) Å, N5···N14ii = 2.876(8) Å, and C17···N17iii = 3.13(1) Å (symmetry codes: i; *x*−1, *y*, *z*, ii; −*x*+1, −*y*+2, −*z*+1,iii; *x*, *y*, *z*+1). The hydrogen bonds are O3–H1S···N17i = 2.795(9) Å, N1–H1A···O4ii = 2.90(1) Å, and O4–H2S···N15iii = 2.92(1) Å) (symmetry codes: i; *x*−1, *y*, *z*, ii; −*x*+1, −*y*+2, −*z*+1,iii; *x*, *y*−1, *z*, i; *x*, *y*, *z*+1, ii; *x*+1, *y*, *z*, and iii; *x*−1, *y*, *z*). (b) The shortest contacts between TCNQ•− molecules are C33···C45 = 3.133(4) Å, C44···C46i = 3.150(4) Å, C49···C58ii = 3.192(4) Å, and N9···C55iii = 3.180(4) Å for **3** (symmetry codes: i; −*x*+2, −*y*, −*z*+1, ii; −*x*+1, −*y*+2, −*z*, andiii; *x*, *y*−1, *z*). The close intermolecular contacts are C6···C12i = 3.182(4) Å, N5···N14ii = 2.857(3) Å, and C17···N17iii = 3.070(3) Å (symmetry codes: i; *x*−1, *y*, *z*, ii; −*x*+1, −*y*+2, −*z*+1,iii; *x*, *y*, *z*+1). The hydrogen bonds are O3–H1S···N17i = 2.774(3) Å, N1–H1A···O4ii = 2.864(4) Å, and O4–H2S···N15iii = 2.899(4) Å) (symmetry codes: i; *x*−1, *y*, *z*, ii; −*x*+1, −*y*+2, −*z*+1,iii; *x*, *y*−1, *z*,i; *x*, *y*, *z*+1, ii; *x*+1, *y*, *z*, and iii; *x*−1, *y*, *z*).


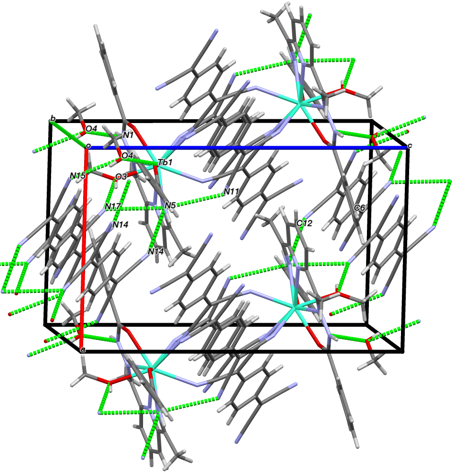


Figure S4. Crystal packing diagram of **2**. Tb, O, N, and C atoms are colored in light-blue, red, blue, and gray, respectively. Light-green dotted lines display the short contacts including hydrogen bonds.


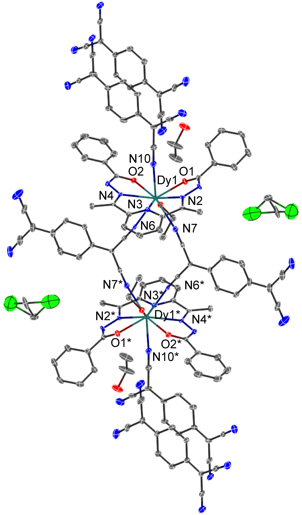


Figure S5. ORTEP drawings of **5** (Type-II). Hydrogens are omitted for clarity (50% probability thermal ellipsoids; symmetry codes (*) –*x*, –*y*, –*z*+2).


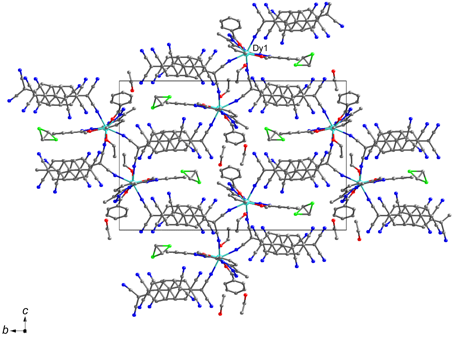


Figure S6. Crystal packing diagram of **5** projected along the *a*-axis. Dy, O, N, and C atoms are colored in light-blue, red, blue, and gray, respectively.


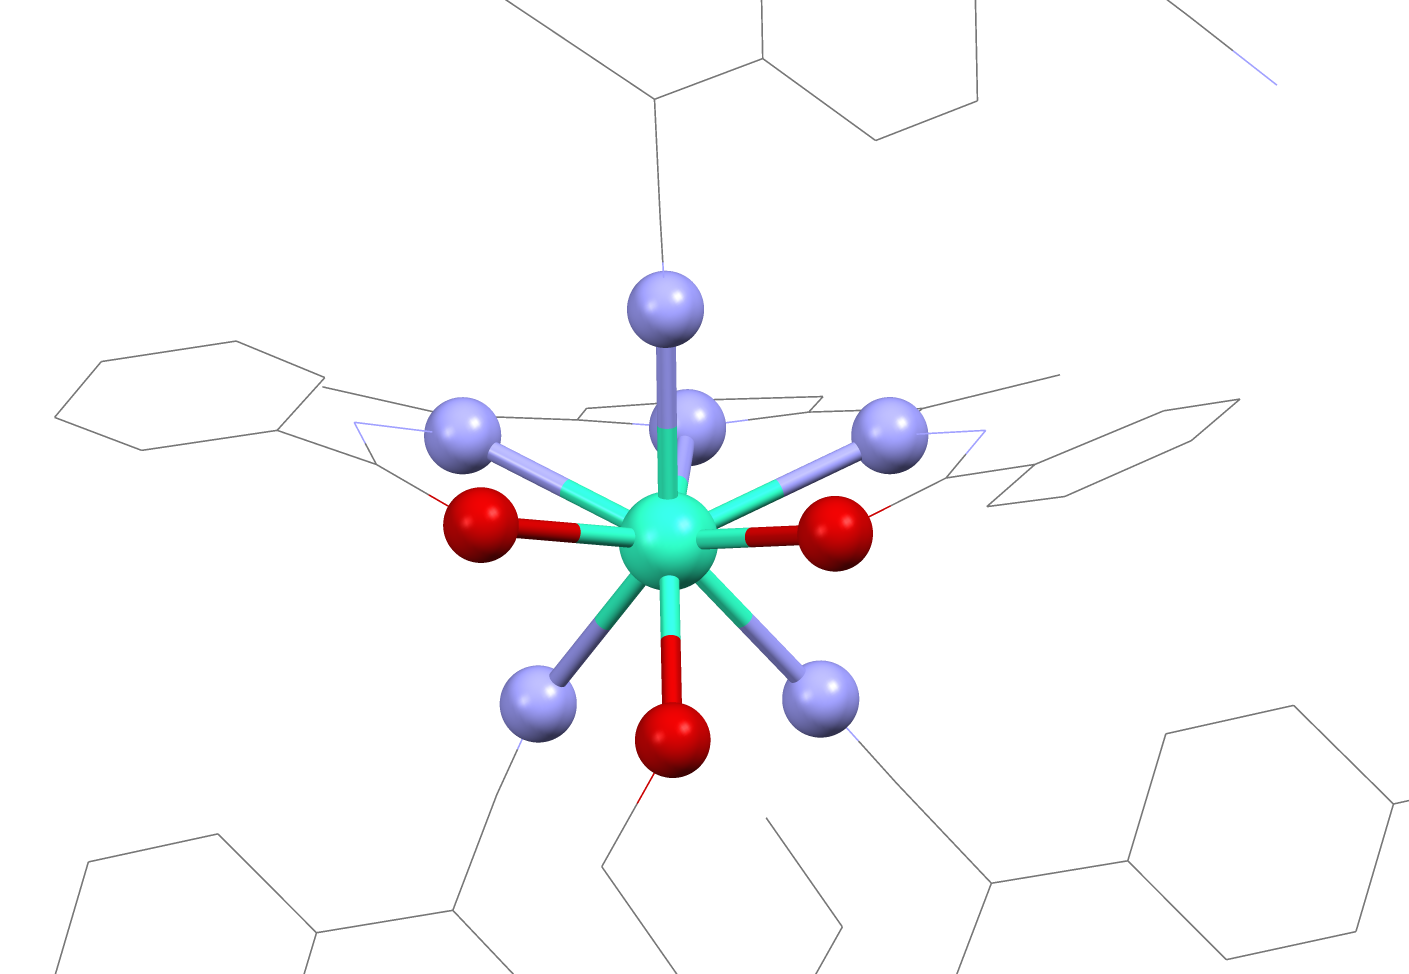


Figure S7. The core structure around TbIII ion for **4**. Tb, light-green; N, purple; O, red.


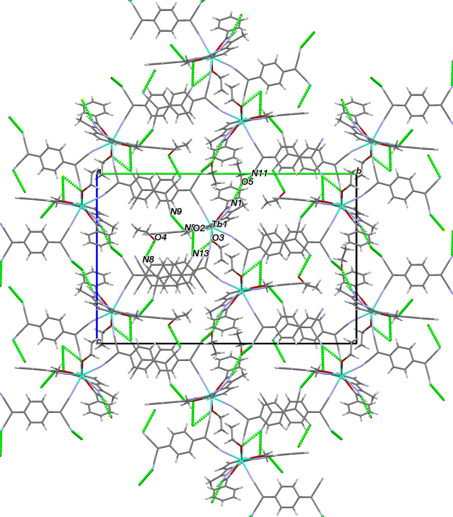


Figure S8. Crystal packing diagram of **5** projected along the *a*-axis. Tb, O, N, and C atoms are colored in light-blue, red, blue, and gray, respectively. Light-green dotted lines display the short contacts including hydrogen bonds. For Dy complex **6**, the short inter-TCNQ•− molecule distances are 3.319(7), 3.288(8), and 3.248(7) Å for **A'**–**B'** (C31···C43i), **B'**–**C'** (C33···C56ii), and **C'**–**A'** (C43···C57), respectively (symmetry codes: i; −*x*+1, *y*−1/2, −*z*+3/2, ii; −*x*+1, −*y*+1, −*z*+1). The close contacts are C2···C12i = 3.359(7) Å, O2···N13i = 3.097(5) Å, and N5···N8ii = 2.792(7) Å (symmetry codes: i; *x*+1, *y*, *z*, ii; −*x*+1, *y*+1/2, −*z*+3/2). The hydrogen bonds are O3−O1S···N13i = 2.885(6) Å, O4–H2S···N11 = 2.884(6) Å, and N1–H1···O4iii = 2.798(6) Å (symmetry codes: i; *x*, −*y*+3/2, *z*+1/2 and ii; −*x*, −*y*+1, −*z*+1).


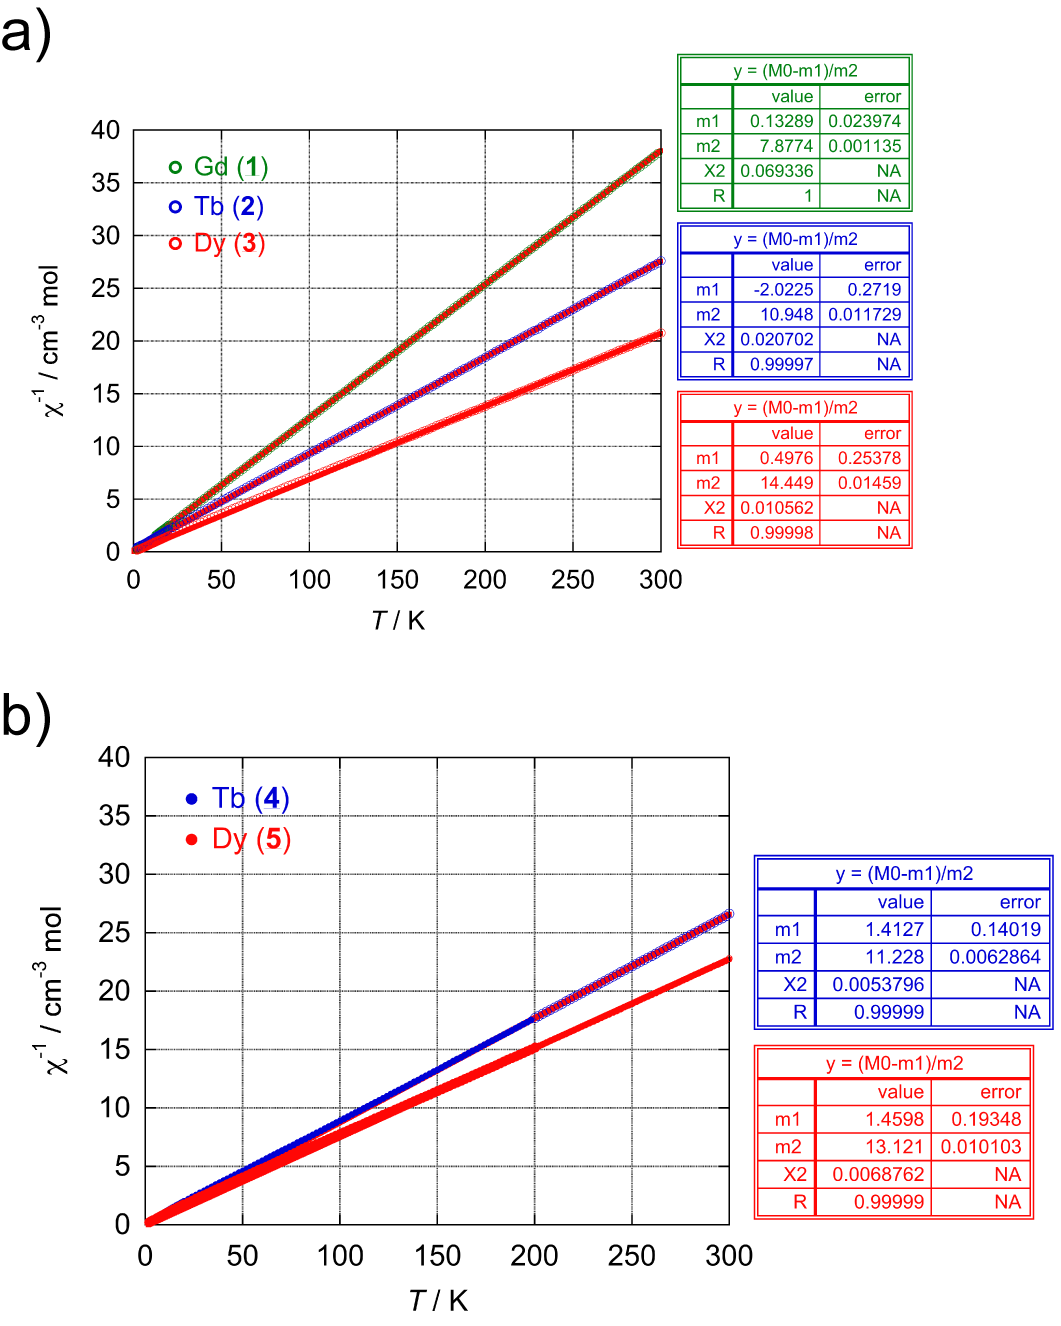


Figure S9. Temperature dependence of the inverse of the susceptibility of (a) **1**, **2**, and **3** (Type-I) and (b) **4** and **5** (Type-II). The red line is the best fit with the Curie–Weiss law in the temperature range 200–300 K.


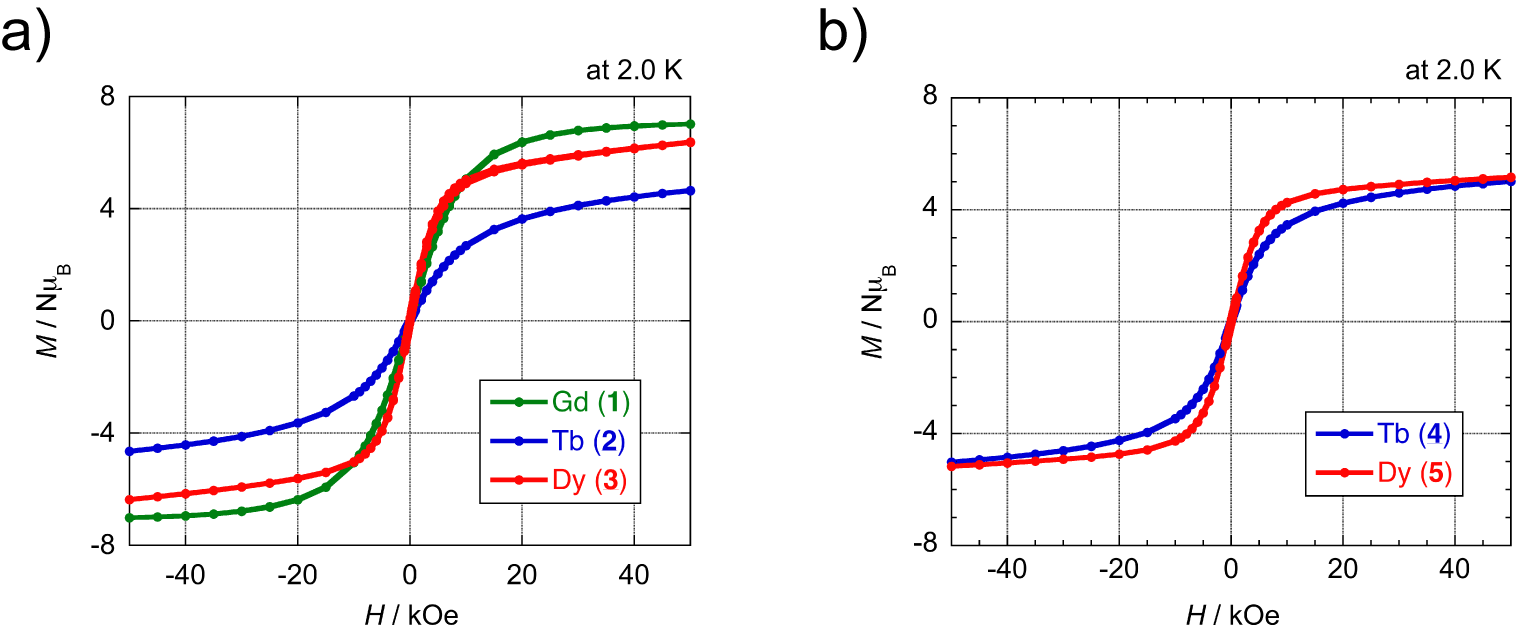


Figure S10. Field dependence of the magnetization of (a) **1**, **2**, and **3** (Type-I) and (b) **4** and **5** (Type-II) at 2.0 K.


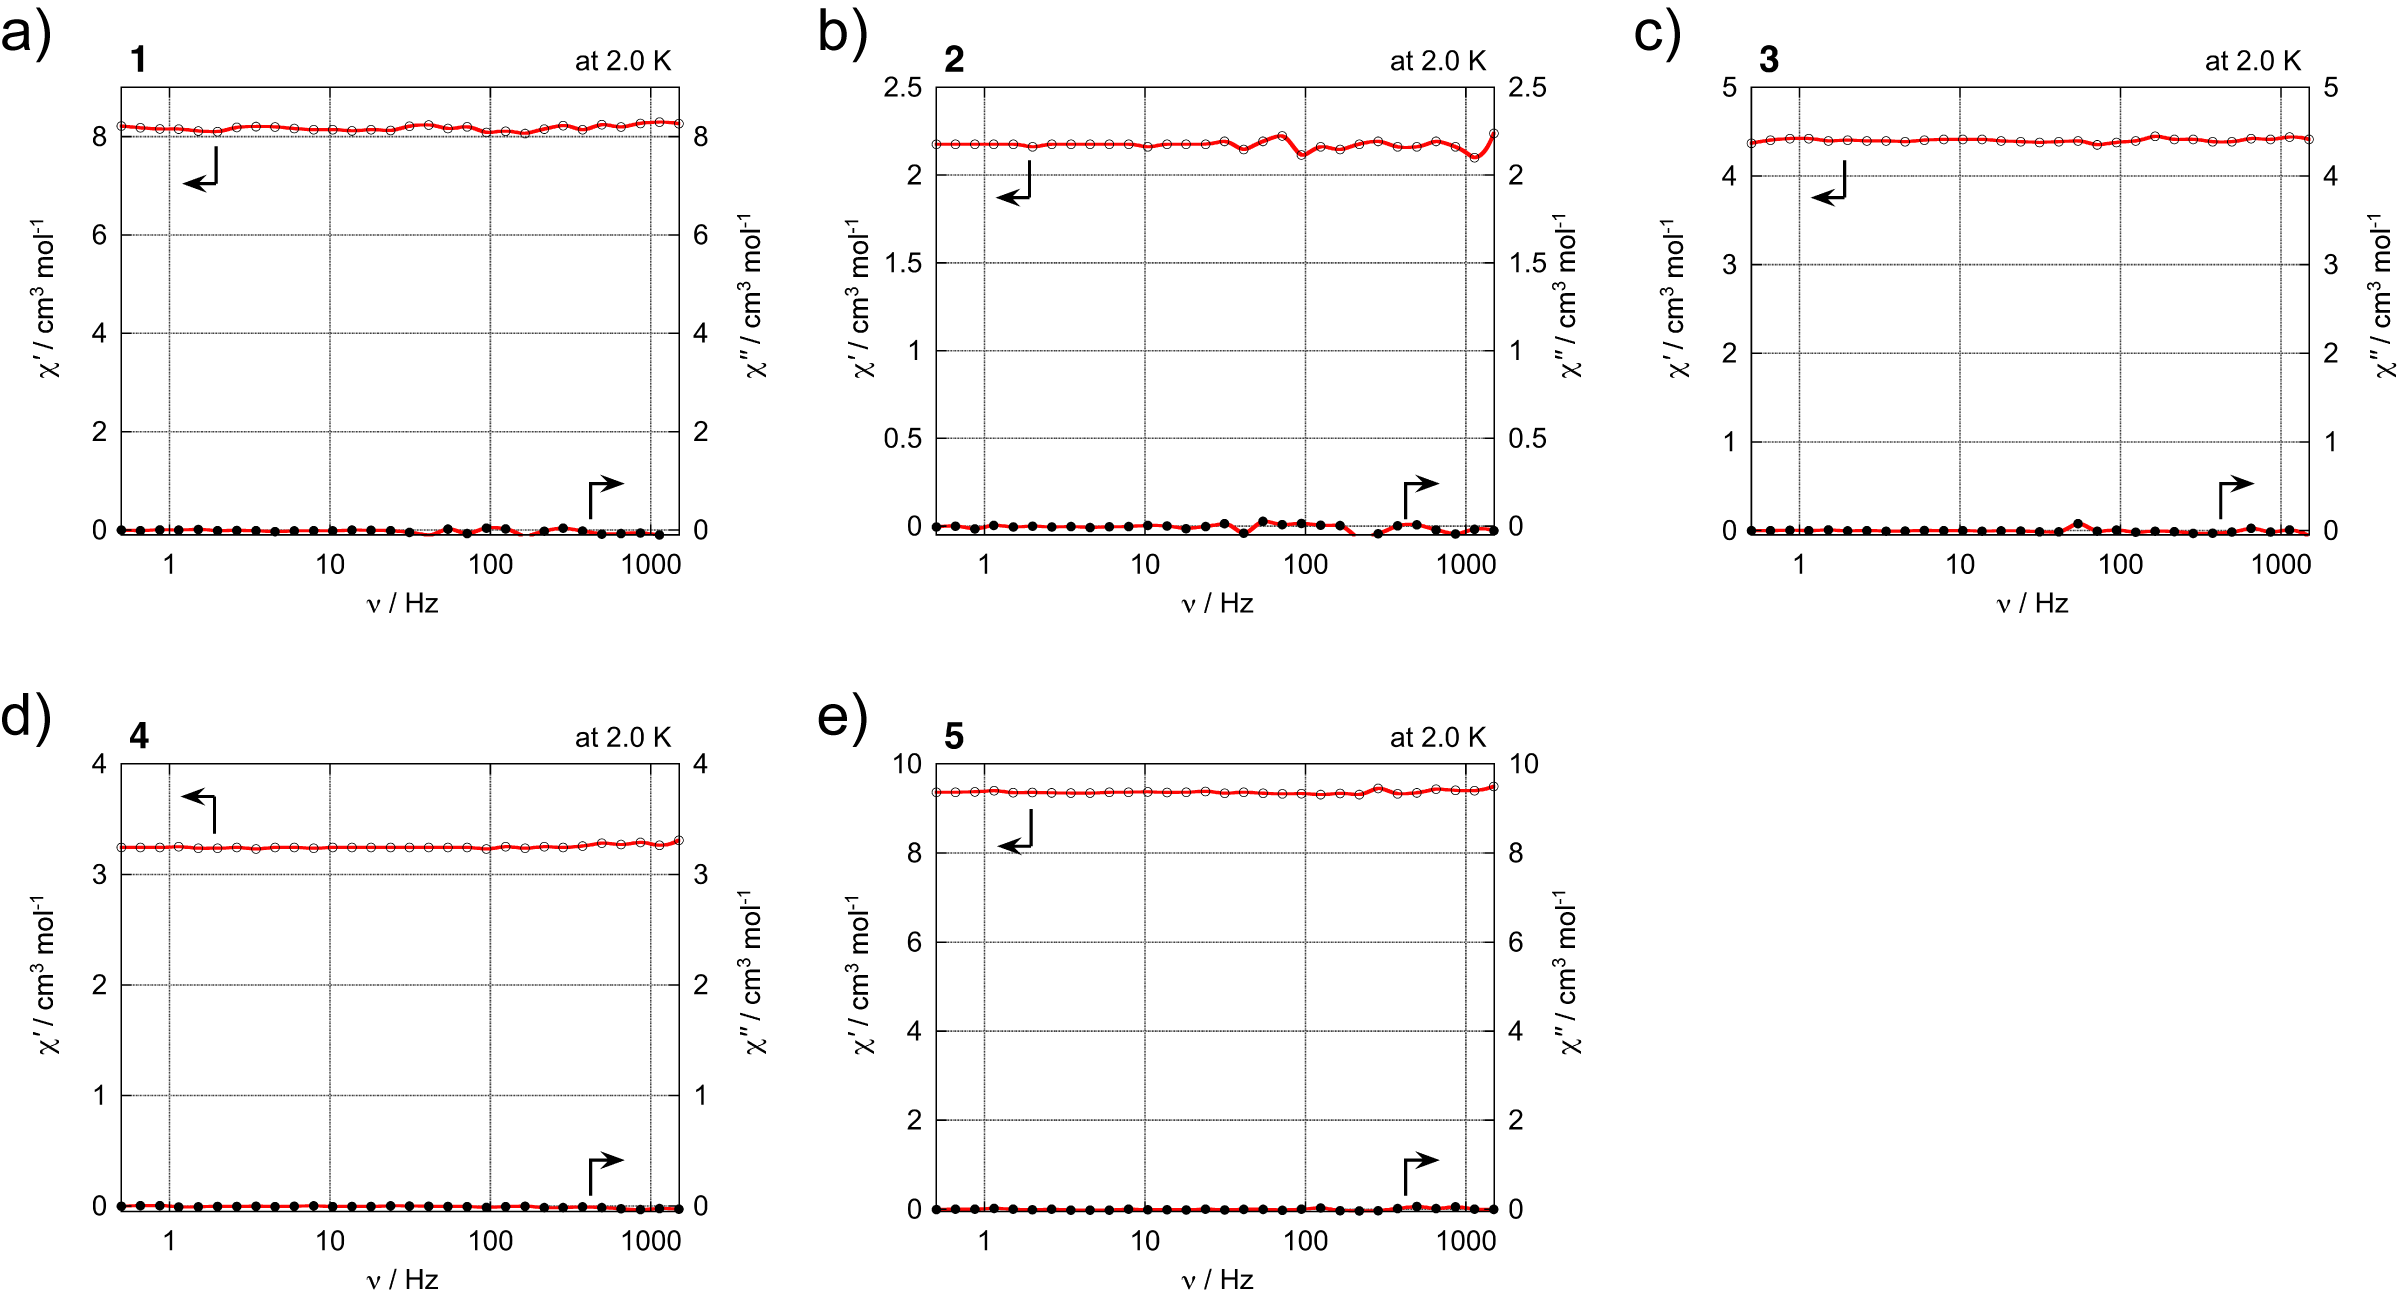


Figure S11. Frequency dependence of the real (*χ*') and imaginary (*χ*'') parts of AC susceptibility measured under zero DC field at 2.0 K. Data are for (a) **1**, (b) **2**, (c) **3**, (d) **4**, and (e) **5**.


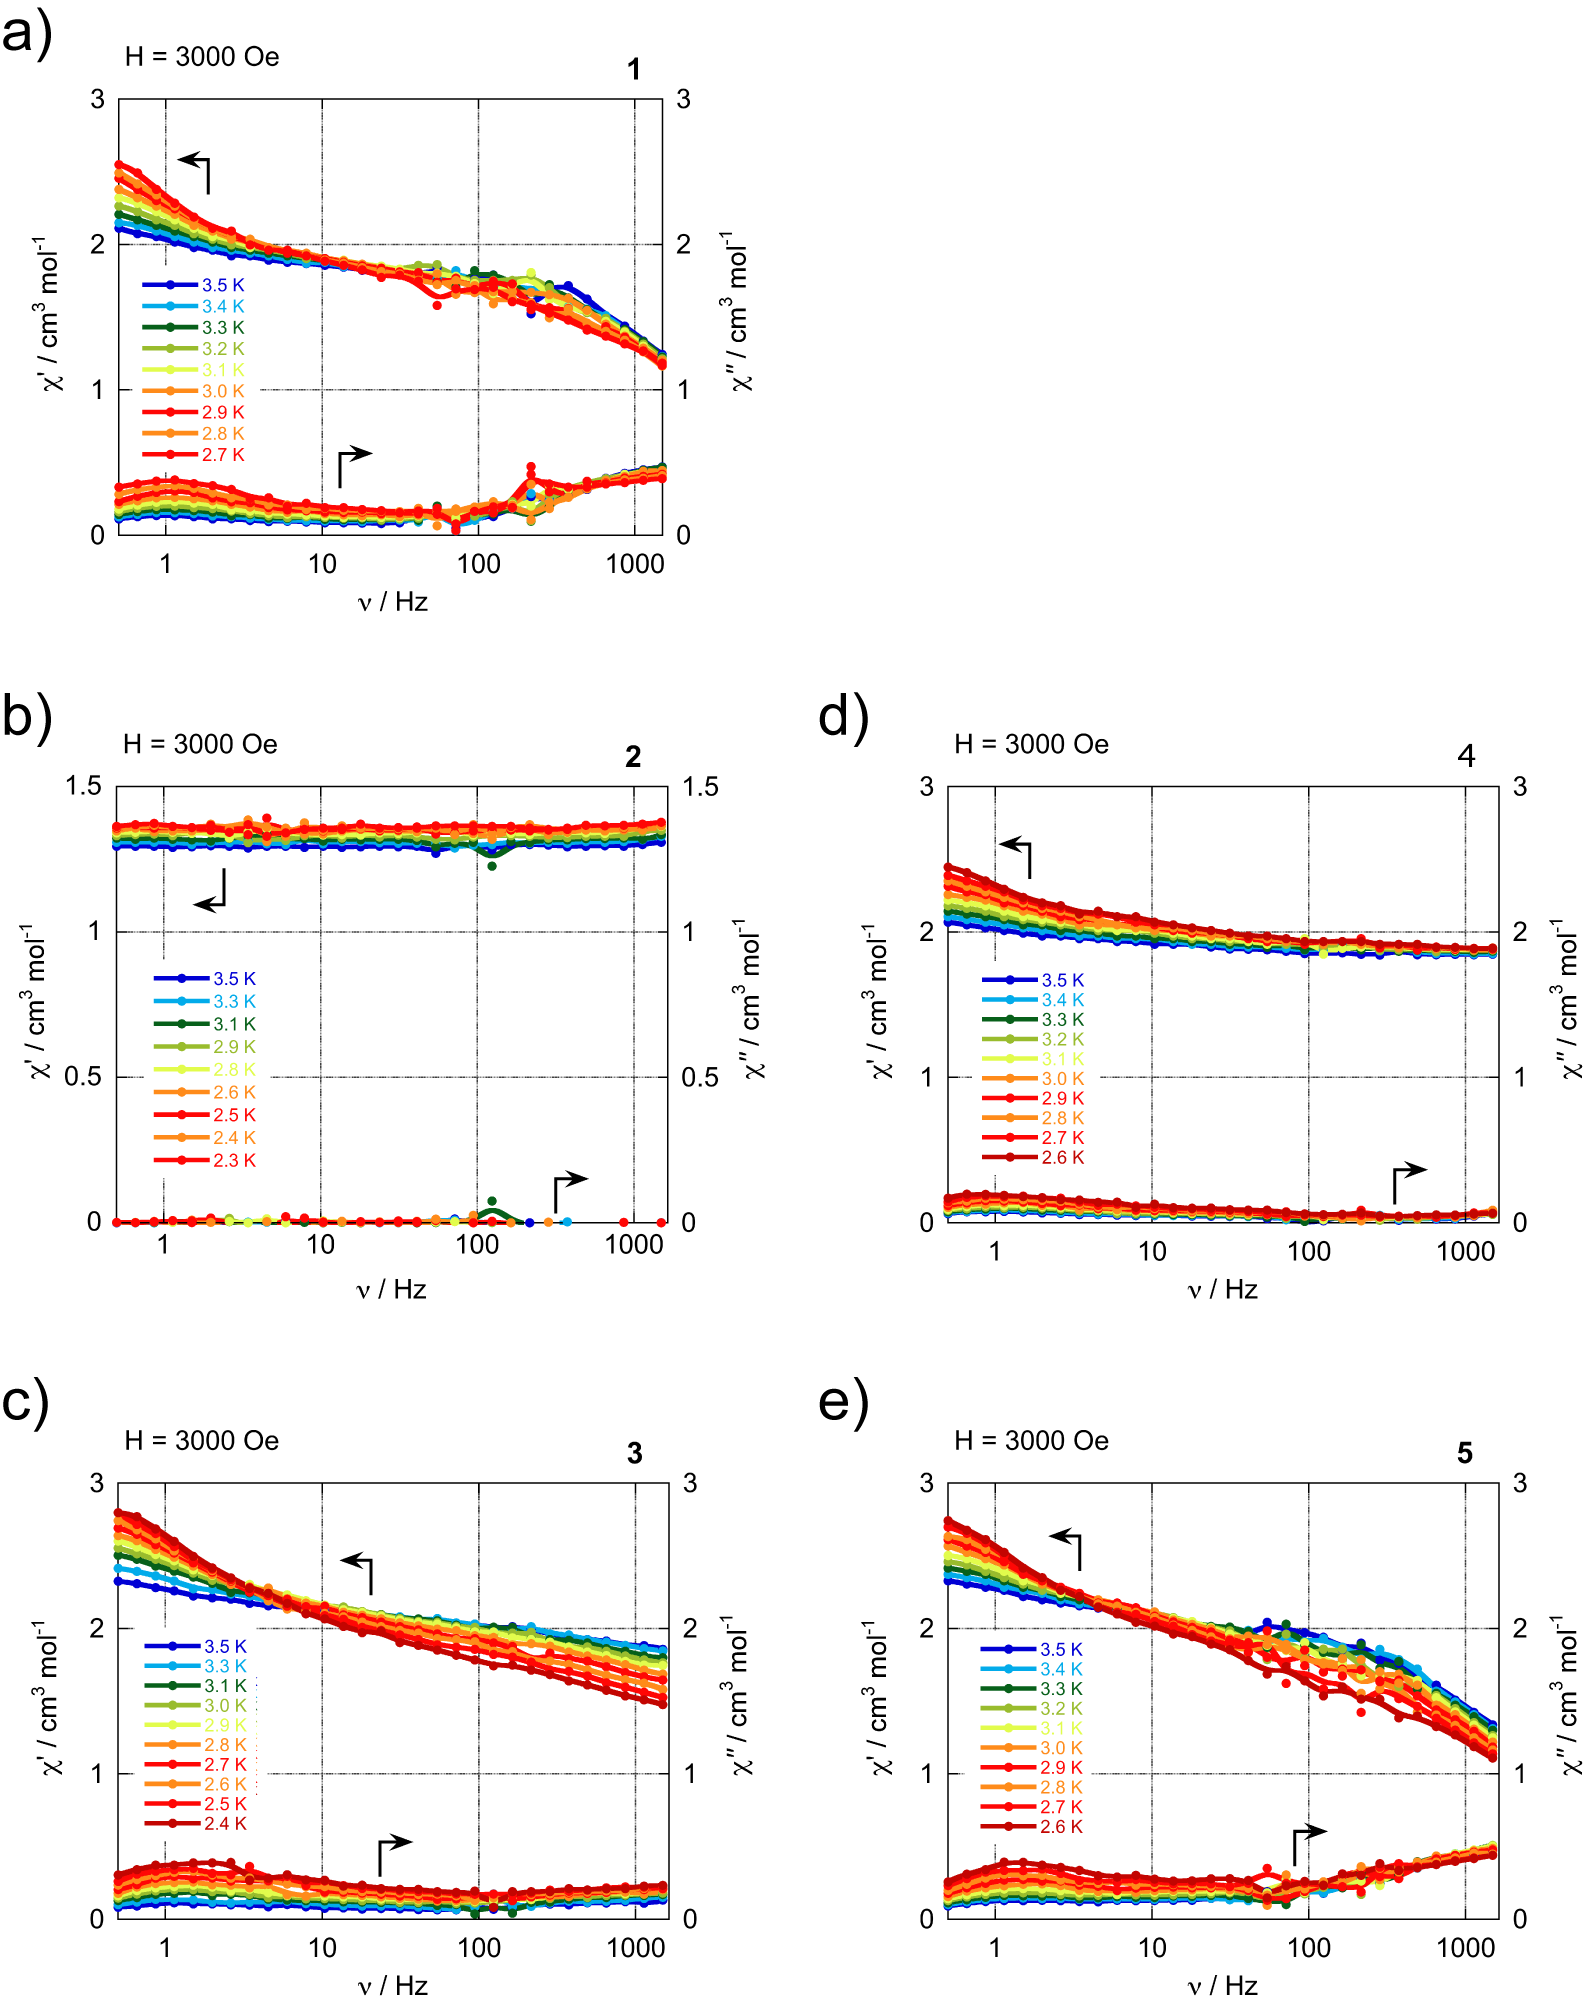


Figure S12. Frequency dependence of the real (*χ*') and imaginary (*χ*'') parts of AC susceptibility measured under 3000 Oe for temperature below 3.5 K. Data are for (a) **1**, (b) **2**, (c) **3**, (d) **4**, and (e) **5**.

Table S1. Summary of bond lengths (Å) for TCNQ·− molecules in **1**-**5** and their estimated charges.


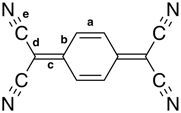


| Complex | Type | a | b | c | d | e | b+d | c/(b+d) | ** [a] | Total charge |
| --- | --- | --- | --- | --- | --- | --- | --- | --- | --- | --- |
| **1** | A | 1.375 | 1.417 | 1.436 | 1.412 | 1.156 | 2.829 | 0.507 | −1.30 | −3.08 |
|  | B | 1.367 | 1.427 | 1.413 | 1.425 | 1.153 | 2.852 | 0.496 | −0.84 |  |
|  | C | 1.368 | 1.422 | 1.421 | 1.423 | 1.150 | 2.845 | 0.499 | −0.94 |  |
| **2** | A | 1.369 | 1.418 | 1.428 | 1.416 | 1.152 | 2.834 | 0.504 | −1.16 | −2.71 |
|  | B | 1.358 | 1.427 | 1.407 | 1.426 | 1.149 | 2.853 | 0.493 | −0.72 |  |
|  | C | 1.361 | 1.424 | 1.412 | 1.422 | 1.149 | 2.846 | 0.496 | −0.83 |  |
| **3** | A | 1.375 | 1.419 | 1.434 | 1.415 | 1.153 | 2.834 | 0.507 | −1.30 | −3.19 |
|  | B | 1.365 | 1.428 | 1.413 | 1.425 | 1.152 | 2.853 | 0.497 | −0.86 |  |
|  | C | 1.368 | 1.424 | 1.422 | 1.422 | 1.152 | 2.846 | 0.501 | −1.03 |  |
| **4** | A | 1.368 | 1.412 | 1.442 | 1.405 | 1.152 | 2.817 | 0.512 | −1.49 | −3.30 |
|  | B | 1.366 | 1.423 | 1.420 | 1.416 | 1.150 | 2.839 | 0.500 | −1.01 |  |
|  | C | 1.360 | 1.426 | 1.412 | 1.426 | 1.147 | 2.851 | 0.495 | −0.80 |  |
| **5** | A | 1.364 | 1.415 | 1.426 | 1.416 | 1.151 | 2.831 | 0.504 | −1.16 | −2.77 |
|  | B | 1.355 | 1.430 | 1.420 | 1.410 | 1.150 | 2.839 | 0.500 | −1.01 |  |
|  | C | 1.351 | 1.428 | 1.403 | 1.431 | 1.141 | 2.859 | 0.491 | −0.61 |  |
| TCNQ [1] | | 1.346(3) | 1.448(4) | 1.374(3) | 1.441(4) | 1.140(1) | 2.889 | 0.476 | 0 |  |
| Rb(TCNQ) [2] | | 1.373(1) | 1.423(3) | 1.420(1) | 1.416(8) | 1.153(7) | 2.839 | 0.500 | –1 |  |

[a] ** = −41.667[c/(b + d)] + 19.833.

[1] R.E. Long, R.A. Sparks, K.N. Trueblood. *Acta Crystallogr.*, **18**, 932 (1965).

[2] A. Hoekstra, T. Spoelder, A. Vos. *Acta Crystallogr., Sect. B*, **28**, 14 (1972).
